# Supplementary material for: Evaluation of Whole Genome Sequencing for Outbreak Detection of Salmonella enterica
Source: PubMed Central journal article supplement (PMC3913712; doi:10.1371/journal.pone.0087991), 2014-02-04
Supplement: pone.0087991.s001.pdf [file pone.0087991.s001.pdf]

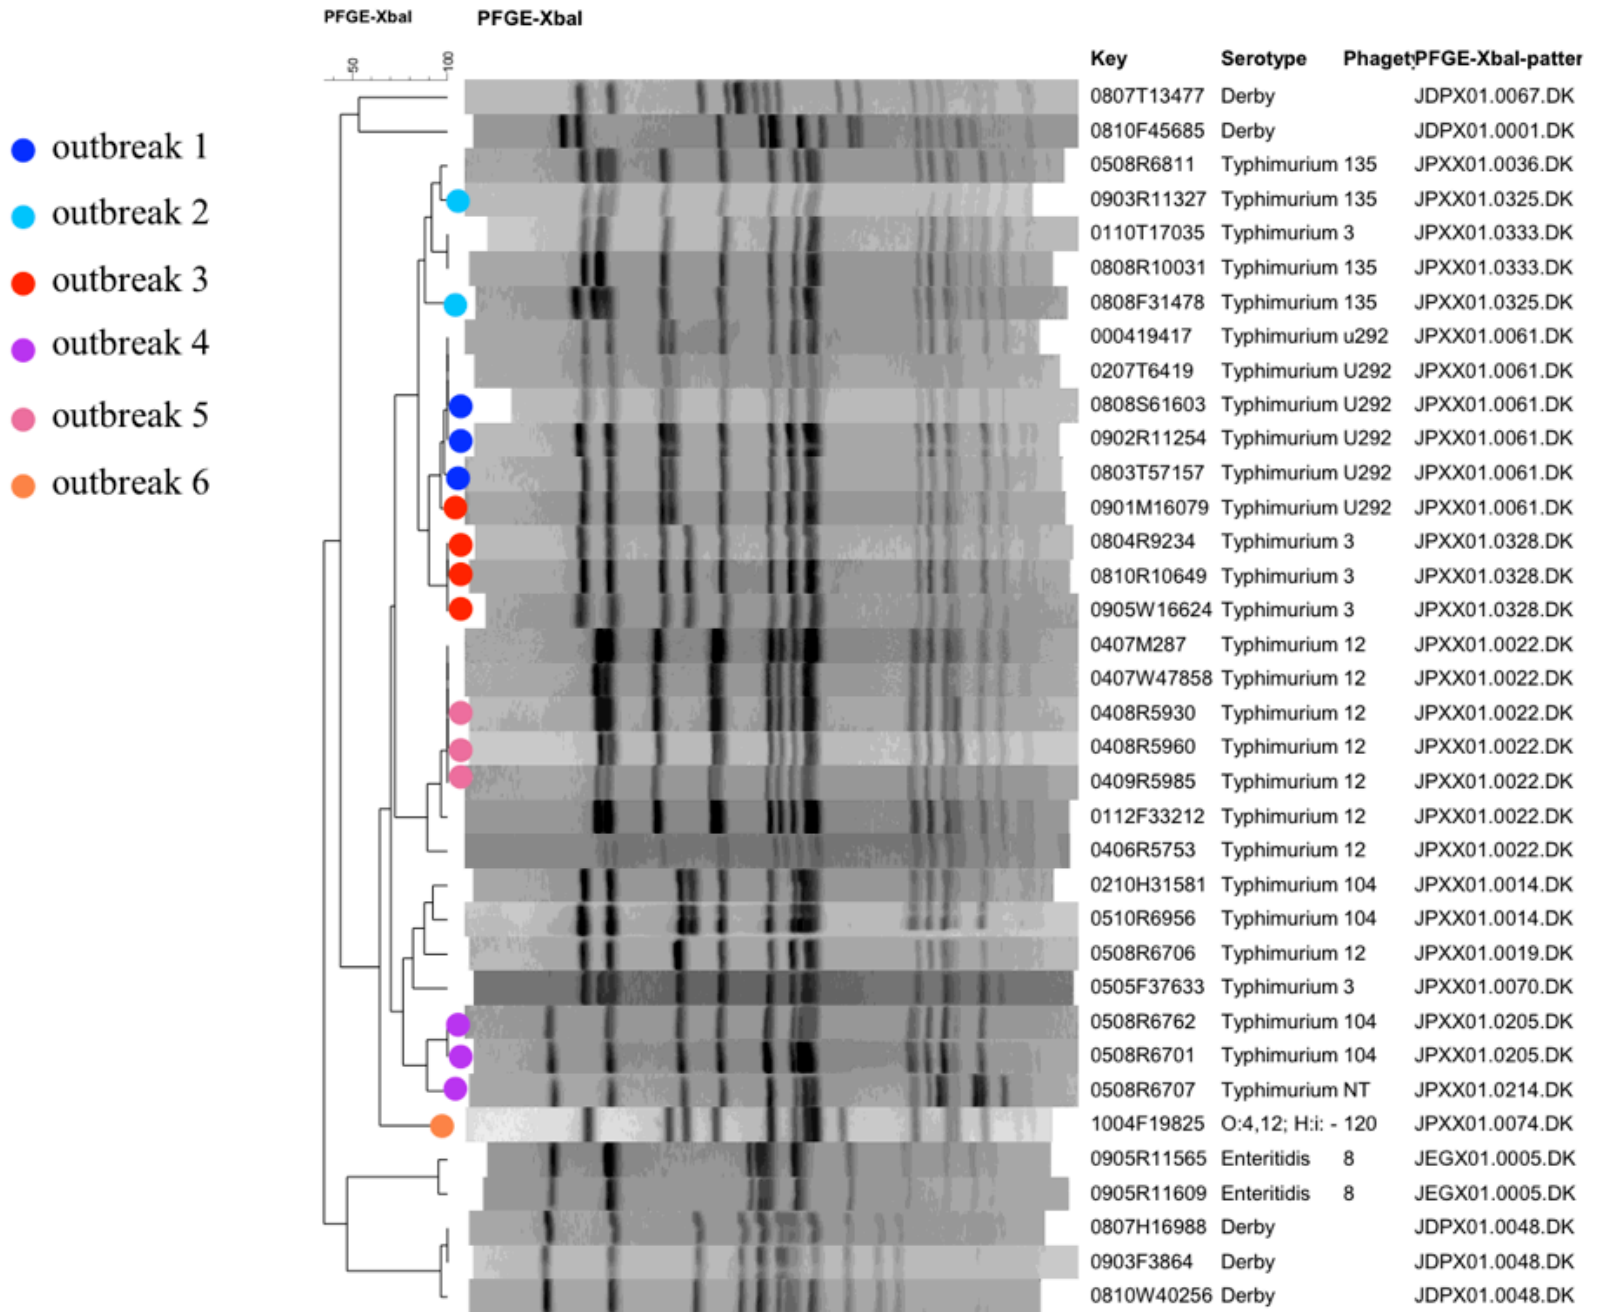

**Figure S1.** An UPGMA band based comparison of pulsed-field gel electrophoresis (PFGE) *XbaI* profiles.
