# Supplementary material for: Evaluation of Whole Genome Sequencing for Outbreak Detection of Salmonella enterica
Source: PubMed Central journal article supplement (PMC3913712; doi:10.1371/journal.pone.0087991), 2014-02-04
Supplement: pone.0087991.s003.pdf [file pone.0087991.s003.pdf]

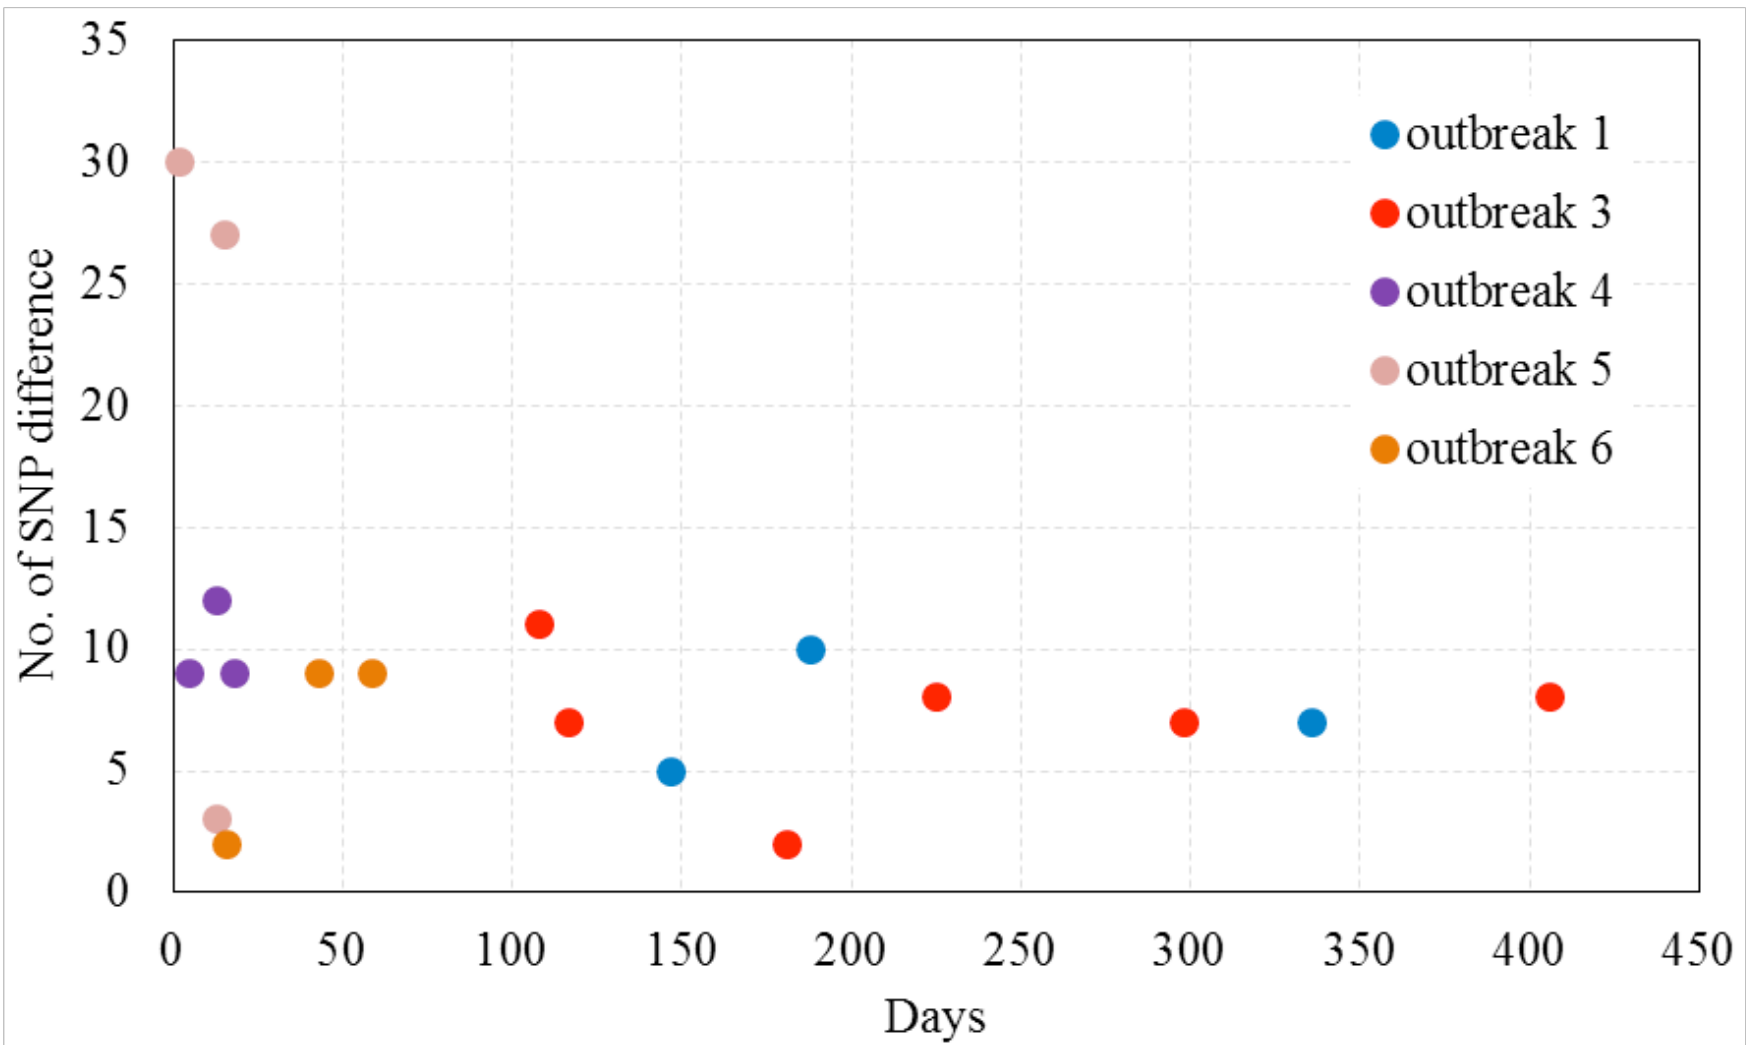

**Figure S3.** The relation between number of days and number of SNP difference among the outbreak strains.
