# Supplementary material for: Evaluation of Whole Genome Sequencing for Outbreak Detection of Salmonella enterica
Source: PubMed Central journal article supplement (PMC3913712; doi:10.1371/journal.pone.0087991), 2014-02-04
Supplement: pone.0087991.s005.pdf [file pone.0087991.s005.pdf]

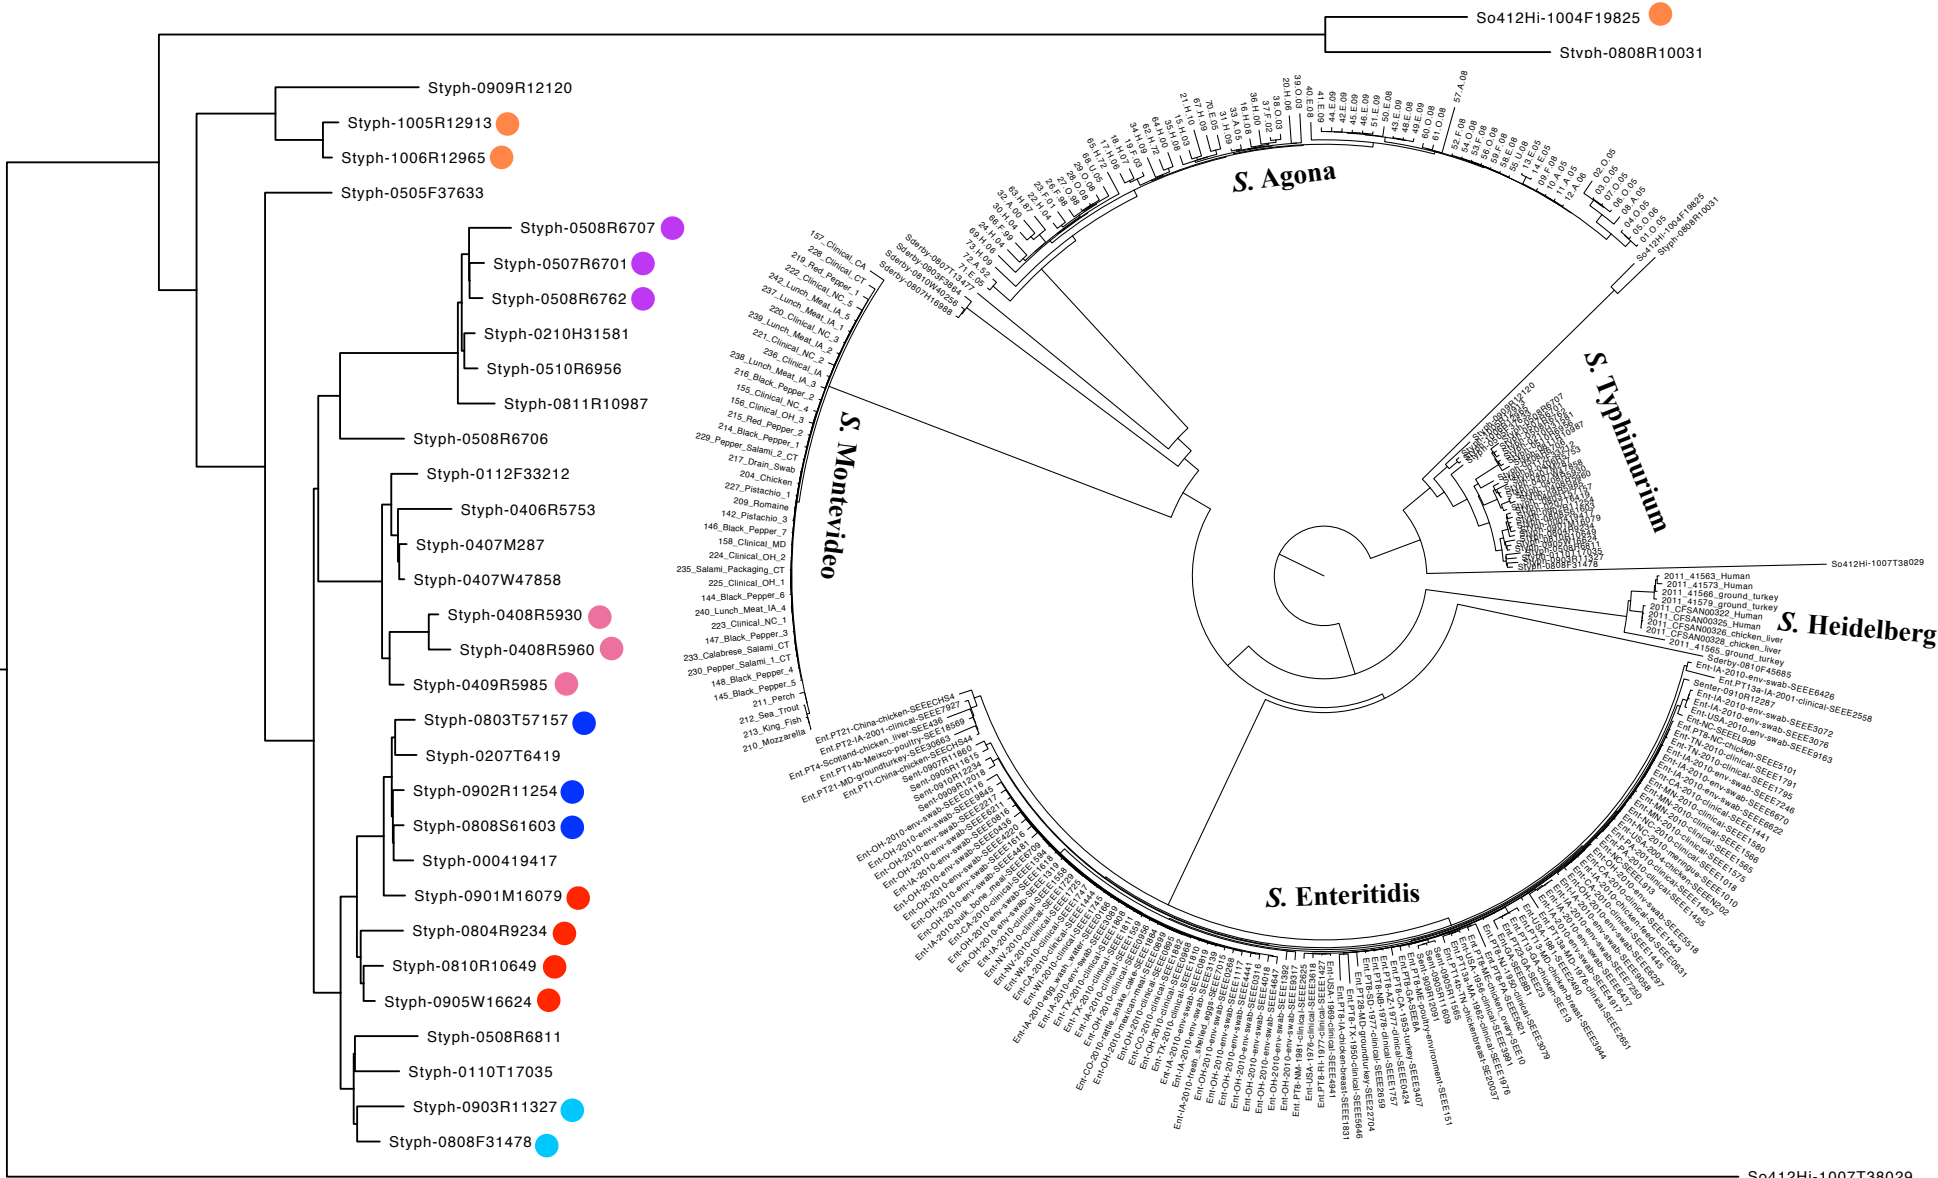

**Supplementary 4B.** K-mer tree constructed from 271 genomes from published data and *Salmonella* genomes under this study
