# Supplementary figures and images for: Evaluation of Whole Genome Sequencing for Outbreak Detection of Salmonella enterica
Source: PLOS journal article supplement (doi:10.1371/journal.pone.0087991), 2014-02-04

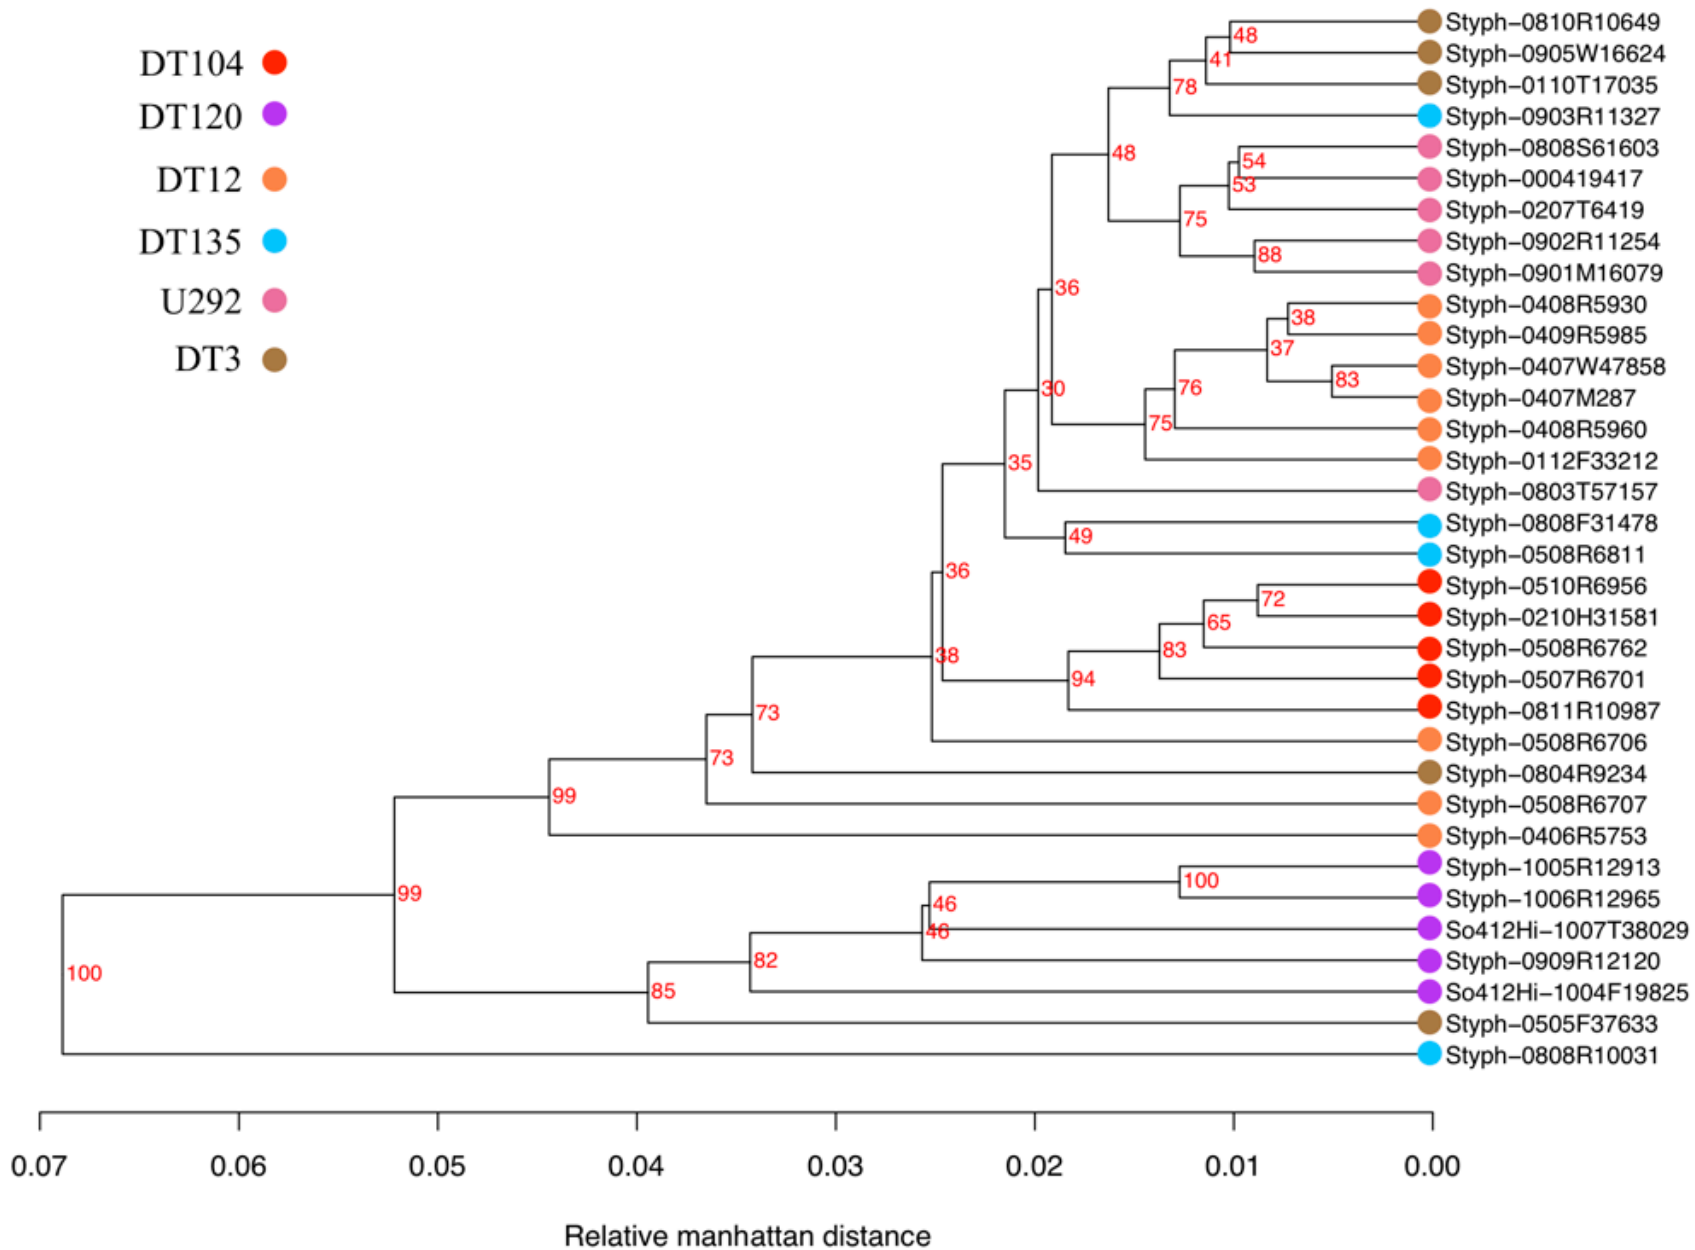

Figure S2. Pan-genome tree with phage typing labels.

Supplement: S2 (10.1371/journal.pone.0087991.s002) [file journal.pone.0087991.s002]
